# Supplementary material
Source: Royal Society of Chemistry journal article supplement (doi:10.1039/d6ay00049e)
Supplement: d6ay00049e1.pdf [file d6ay00049e1.pdf]

### Supplementary Materials

As shown in Figure S1, the horizontal axis represents temperature, while the vertical axis denotes quenching efficiency. The fluorescence spectra of the ZnO/C QDs dual-quantum-dot system containing mercury ions ( $\text{Hg}^{2+}$ ) were measured at temperatures of 5°C, 10°C, 15°C, 20°C, and 25°C. The results indicate that the quenching efficiency gradually increases with rising temperature, a characteristic feature of dynamic quenching. These data further rule out the possibility of simultaneous static and dynamic quenching.

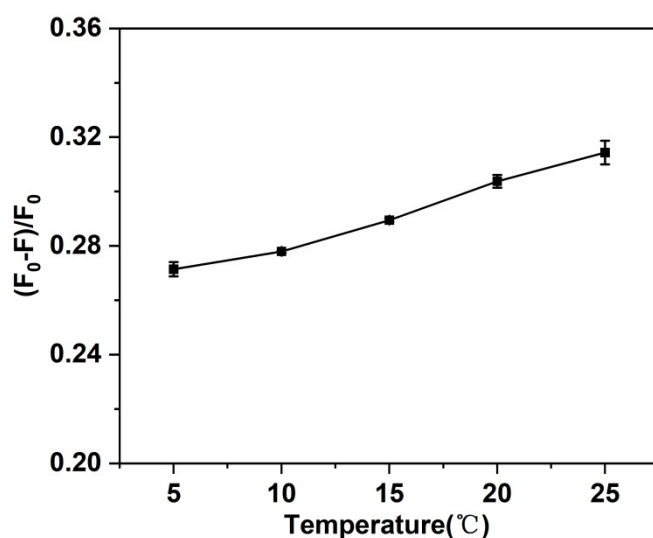

Figure S1: Effect of Temperature on Quenching Efficiency

Effect of pH (Figure S2): The sensor's fluorescence intensity was measured across a pH range of 6.0 to 9.0. Optimal fluorescence response and stability were observed at pH 7.5, which was therefore selected for all subsequent experiments.

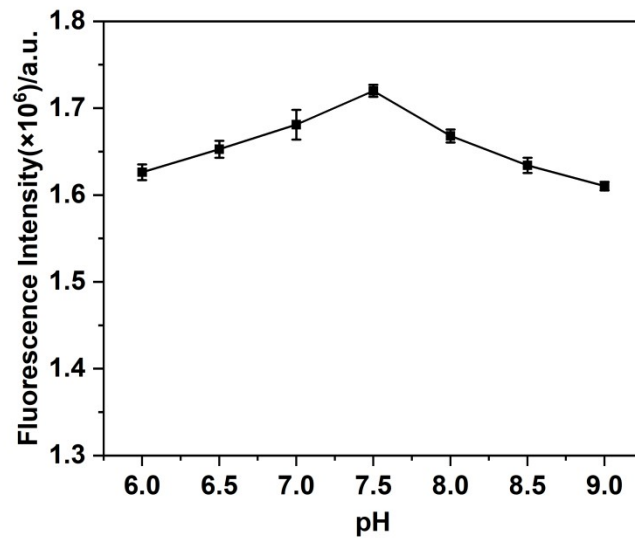

Figure S2: Effect of pH on Sensor Fluorescence Intensity

Effect of Storage Duration (Figure S3): Sensors were stored at 4°C, with fluorescence intensity measured every 5 days. Even after 25 days of storage, no significant change in fluorescence intensity was observed, indicating excellent stability.

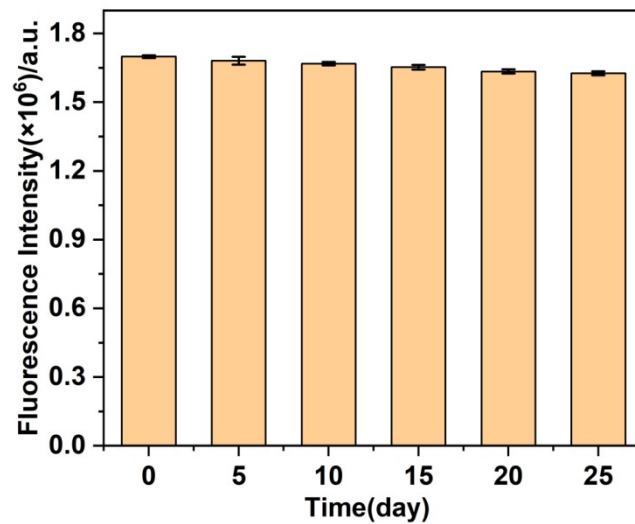

Figure S3: Effect of Storage Time on Sensor Fluorescence Intensity

Effect of Temperature (Figure S4): The fluorescence intensity of the sensor was tested at different temperatures (10–40°C). The sensor exhibited relatively stable fluorescence within the 25–30°C range. All detection experiments were conducted at a controlled room temperature of 25°C.

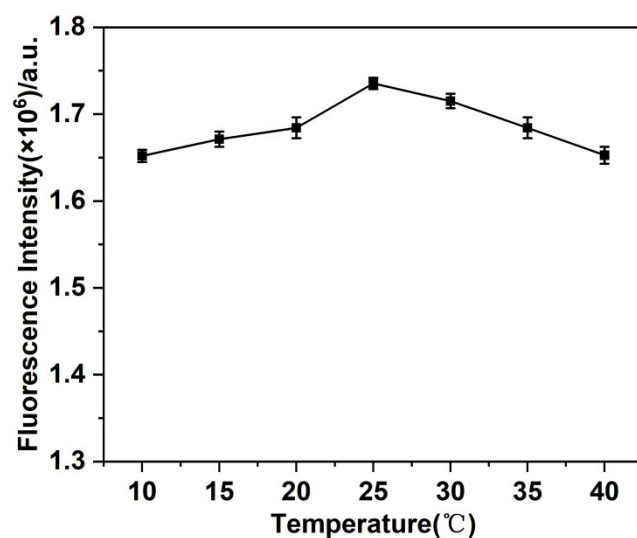

Figure S4: Effect of Temperature on Sensor Fluorescence Intensity

In Figure S5,  $F$  represents the difference between  $F_0$  and  $F_1$ , where  $F_0$  denotes the fluorescence intensity of ZnO/C QDs, and  $F_1$  denotes the fluorescence intensity of ZnO/C QDs + interfering substances. Common metal ions at a concentration of 100  $\mu\text{mol/L}$  (e.g., sodium ions, potassium ions, calcium ions) to the sensor system and measured the changes in fluorescence intensity. Except for  $\text{Hg}^{2+}$ , other ionic substances showed negligible quenching effects on the sensor, indicating that the ZnO/C QDs fluorescence sensor exhibits excellent selectivity toward  $\text{Hg}^{2+}$ . In Figure S6,  $F$  equals  $F_3$  minus  $F_2$ , where  $F_2$  represents the fluorescence intensity of ZnO/C QDs +  $\text{Hg}^{2+}$ , and  $F_3$  denotes the fluorescence intensity of ZnO/C QDs +  $\text{Hg}^{2+}$  in the presence of different interfering substances. The figure shows that OA, TA,  $\text{Cl}^-$ ,  $\text{NO}_3^-$ ,  $\text{HCO}_3^-$ ,  $\text{CO}_3^{2-}$ ,  $\text{SO}_4^{2-}$ ,  $\text{K}^+$ ,  $\text{Na}^+$ , and  $\text{Ca}^{2+}$  do not interfere with the detection of  $\text{Hg}^{2+}$  by ZnO/C QDs, confirming the sensor's excellent anti-interference capability.

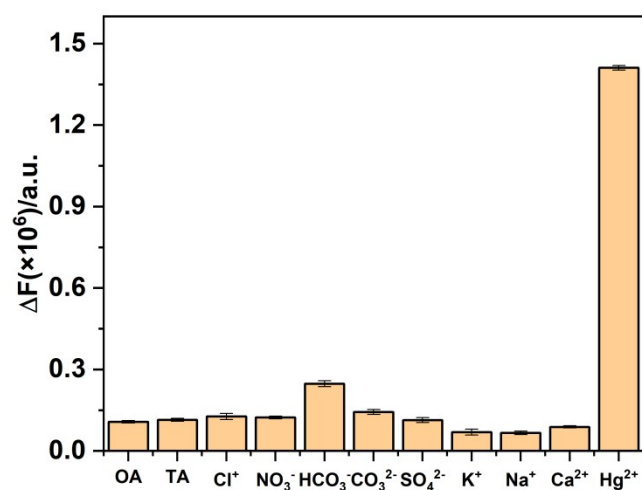

Figure S5: Selectivity of ZnO/C QDs ( $\text{Hg}^{2+}$  concentration:  $10 \mu\text{mol/L}$ ; interference substance concentration:  $100 \mu\text{mol/L}$ )

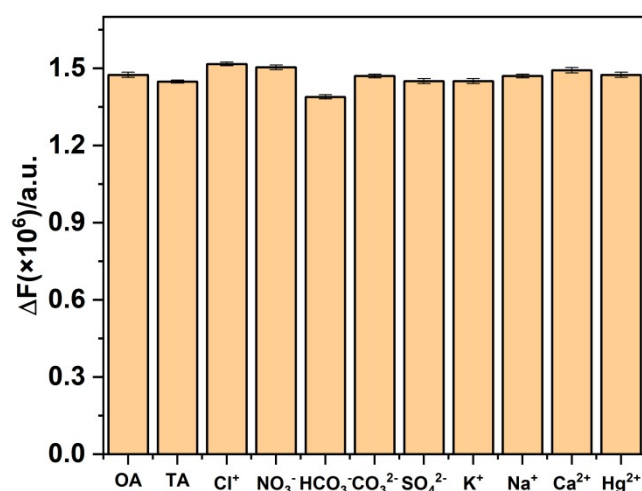

Figure S6: Interference resistance of ZnO/C QDs ( $\text{Hg}^{2+}$  concentration:  $10 \mu\text{mol/L}$ ; interference substance concentration:  $100 \mu\text{mol/L}$ )

We measured the fluorescence spectra of ZnO QDs (without C QDs) and ZnO/C QDs in the presence of  $\text{Hg}^{2+}$  at different concentrations ( $4\text{--}12 \mu\text{mol/L}$ ). The results indicate that standalone ZnO QDs exhibit a certain degree of fluorescence response to  $\text{Hg}^{2+}$ , but their quenching efficiency is significantly lower than that of the ZnO/C QDs dual-quantum-dot system. This demonstrates that the combination of ZnO QDs and C QDs substantially enhances the sensitivity of  $\text{Hg}^{2+}$  detection.

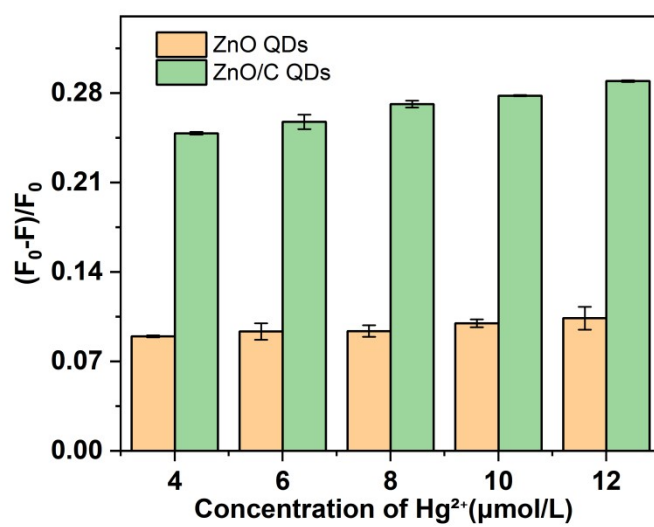

Figure S7: Effect of Different  $Hg^{2+}$  Concentrations on the Quenching Efficiency of ZnO QDs and ZnO/C QDs
